# Supplementary material
Source: publisher site journal article supplement (https://www.dovepress.com/article/411395)
Supplement: Supplementary file 1 [file get_supplementary_file.php]

**Combining SERS microfluidic chip with functionalized AuNCAs for early lung cancer prognosis in mice**

Yayun Qian1**, Yuexing Gu2, Jialin Deng3, Zhaoying Cai3, Yang Wang3, Ruoyu Zhou3, Dongxu Zhu3, Hongmei Lu4, Zheng Wang1*

1Department of Pathology, The Affiliated Hospital of Yangzhou University, Yangzhou University, Yangzhou, P. R. China

2Institute of Translational Medicine, Medical College, Yangzhou University, Yangzhou, P. R. China

3Jiangsu Key Laboratory of Integrated Traditional Chinese and Western Medicine for Prevention and Treatment of Senile Diseases, Yangzhou University, Yangzhou, P. R. China

4Department of Pathology, Yangzhou Maternal and Child Health Hospital, Yangzhou, P. R. China

*Corresponding author: Zheng Wang,yzdxfsyywz@163.com

**Corresponding author: Yayun Qian, yyqian@yzu.edu.cn

**Optimization of experimental conditions**

Since the tDNA produced by the EASA reaction serves as the trigger for the CHA reaction, optimization of polymerase and nucleic acid endonuclease concentrations, reaction temperature and reaction time is required (Supporting Information, Fig. S1). As shown in Fig. S1a, the Raman signal intensity gradually increased with increasing polymerase concentration and stabilizes at 0.20 U·µL-1. Similarly, the endonuclease stabilized at 0.30 U·µL-1 (Fig. S1b). In addition, the reaction temperature and reaction time were optimized to 38°C and 120 min, respectively (Fig. S1c and S1d). Therefore, in the next experiments, tDNA was obtained using 0.20 U·µL-1 of polymerase and 0.30 U·µL-1 of endonuclease at 38 °C for 120 min.


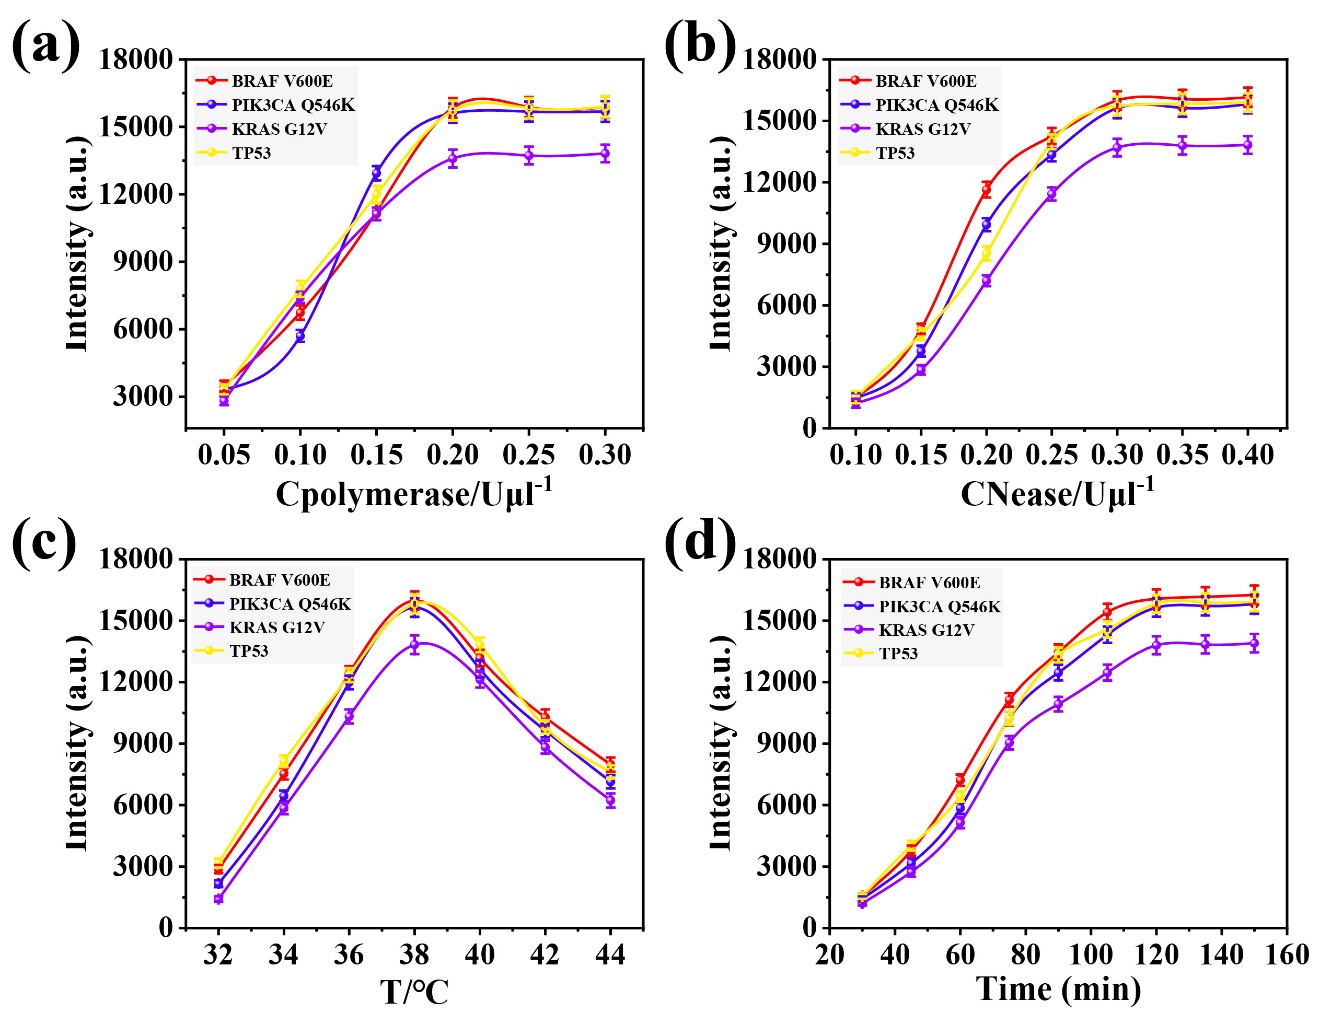


**Fig. S1** Enzyme-assisted amplification experimental conditions optimization: Effects of (a) DNA polymerase and (b) endonuclease concentrations on SERS signal. (c) Influence of reaction temperature and (d) time on SERS signal.

**Reproducibility assessment of the microfluidic chip**

To avoid the influence of different microfluidic chips on detection, it was necessary to analyze the reproducibility of microfluidic chips. Eight batches of microfluidic chips were prepared to detect BRAF V600E, PIK3CA Q546K, KRAS G12V and TP53 at different times. The SERS spectra were shown in Fig. S2a and Fig. S2c. The characteristic peak intensities at 1000 cm-1 and 1330 cm-1 occasionally changed (Fig. S2b and S2d). Therefore, different batches of microfluidic chips do not affect the detection results.


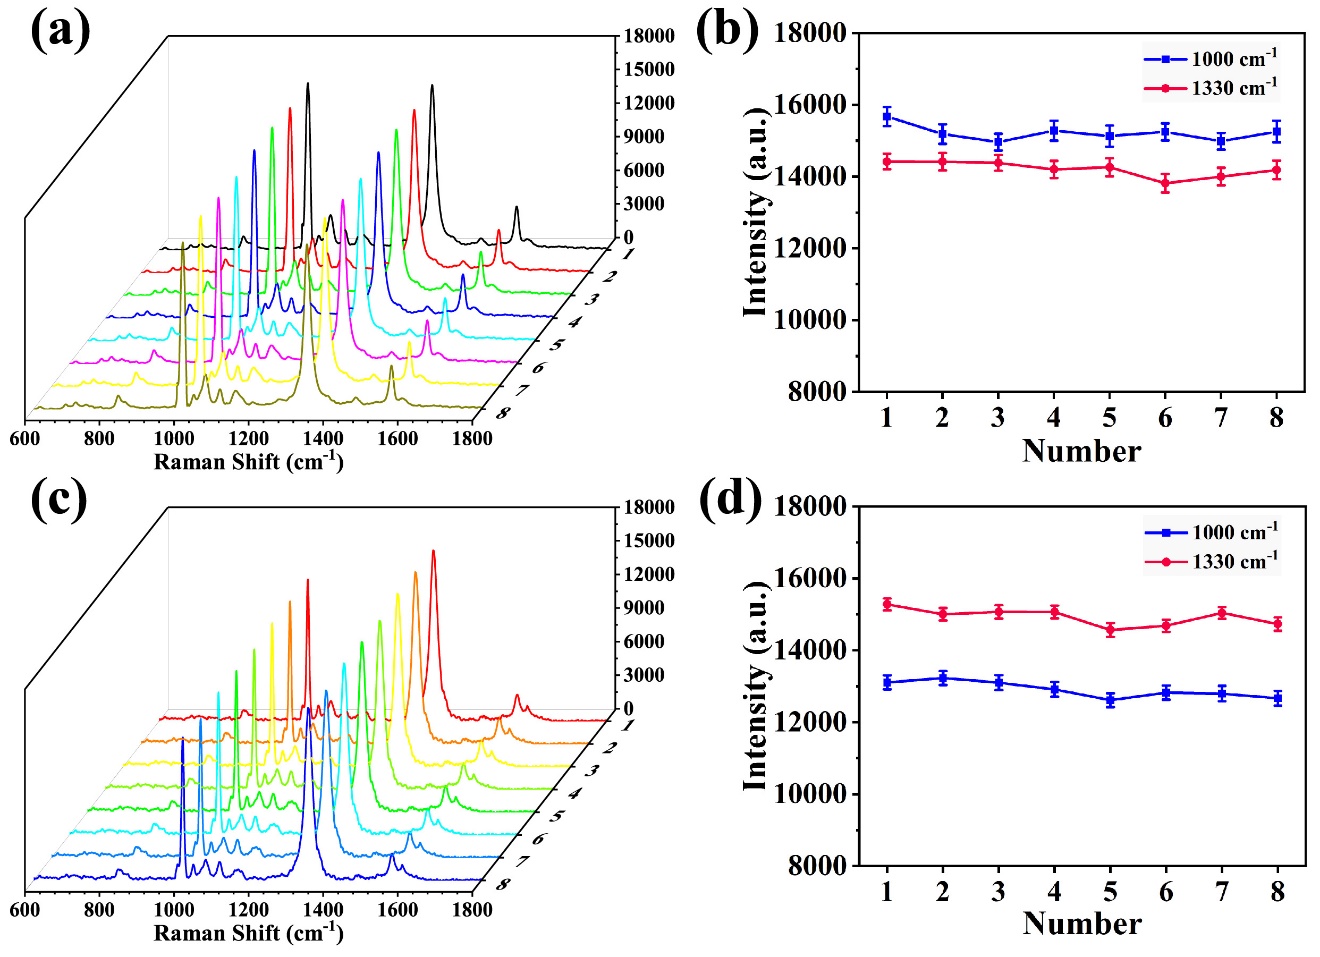


**Fig. S2** Reproducibility assessment of Reaction Zone I: (a) Spectra obtained from the detection of BRAF V600E and PIK3CA Q546K using eight different batches of prepared microfluidic chips and (b) scatter plots corresponding to the SERS signal intensities at 1000 cm-1 and 1330 cm-1. Reproducibility assessment of Reaction Zone II: (c) Spectra obtained from the detection of KRAS G12V and TP53 using eight different batches of prepared microfluidic chips and (d) scatter plots corresponding to the intensity of the SERS signal at 1000 cm-1 and 1330 cm-1.


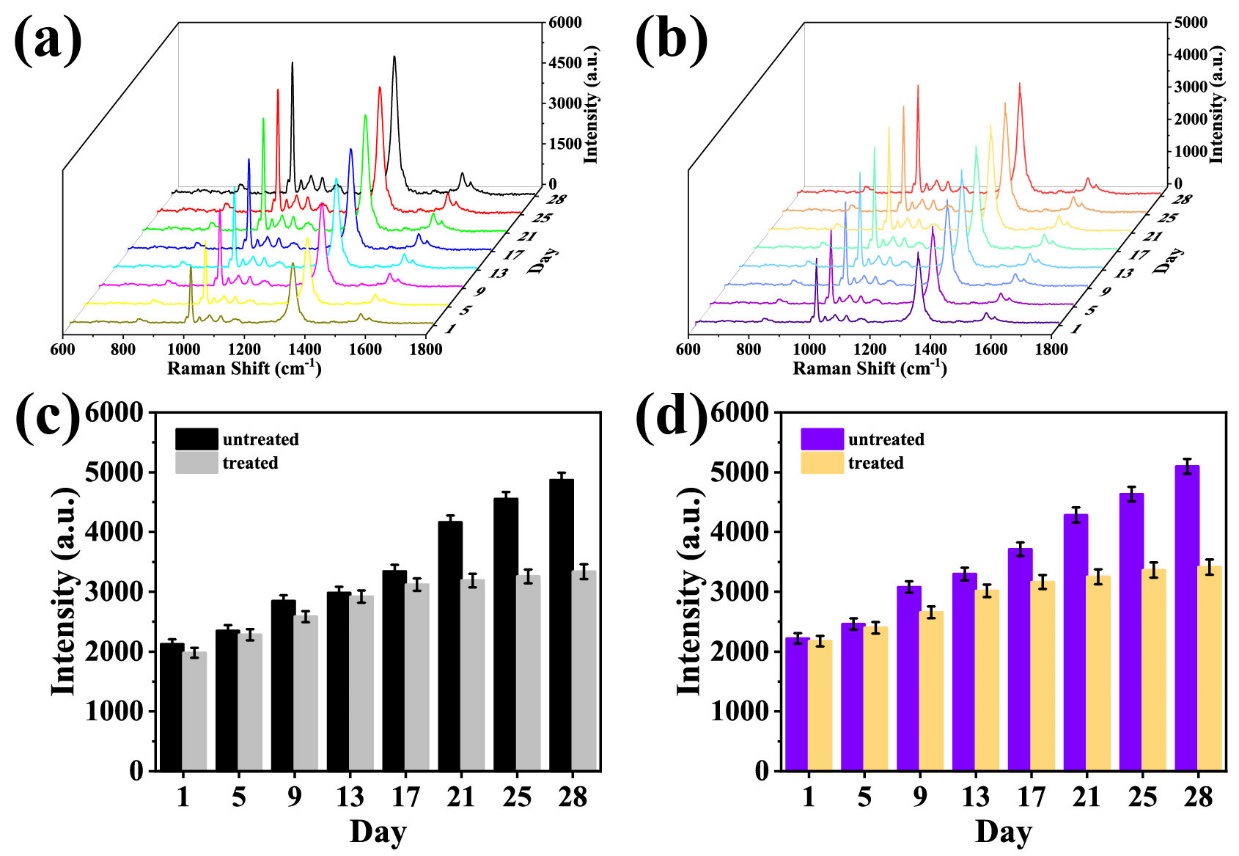


**Fig. S3** (a) SERS spectra of KRAS G12V and TP53 in serum from nude mice with lung cancer without cisplatin treatment. (b) SERS spectra of KRAS G12V and TP53 in serum from cisplatin-treated lung cancer nude mice. (c) Histogram of signal intensity at 1000 cm-1 corresponding to untreated and cisplatin-treated. (d) Histograms of signal intensity at 1330 cm-1 corresponding to untreated and cisplatin treatment.

**Table S1** Sequences of oligonucleotides used in the experiment

| **Name** | **Sequence (5' - 3')** |
| --- | --- |
| HP1-1 | HS-TTTATGCTACGGACCCAGGACCTGGACTGGCATATGGCATCTGTTGGT CCAGACATGCCAGTCCAGGTCCTGGGTCCGCATCCTCATATCAG |
| HP1-2 | HS-TCACAGTAATCGTACGTAGATCTGACTAGCTTATCGTACATCTACGTA  CGATTACTGACACCTCAGCA |
| HP1-3 | HS-CATTACGTTACGAACGTCATACCGGTACACGTACATGACGTTCGTAA  TCGTATCCTCAACT |
| HP1-4 | HS-GACTCCTGAAGGATCGTGAGTACATGACTTGATCATCAGATCCTTCAG  GACTCCTCA |
| HP2-1 | TATGTAATGGCATCTGTTGGTCCAGACCGGACCCAGGACCTGGACTGGCAT GTCTGGACCAACAGATGCCATATGCCAGTCCATGATC |
| HP2-2 | CTACTGACTAGCTTATCGTACCAGTAATCGTACGTAGATGTACGATAAGCT  AGTCAG ATCTACGTACGATTACTG |
| HP2-3 | TGACTACCGGTACACGTACAACGTTACGAACGTCATGTACGTGTACCGGTA  TGACGTTCGTAATCGT |
| HP2-4 | GACGTACATGACTTGATCATCCTGAAGGATCGTGATGATCAAGTCATGTAC  TCACGATCCTTCAGGA |
| MT1-1 | GATTTCTGTGTAGCTA |
| MT1-2 | GGGTCTTTCAAATGTATGCAATG |
| MT1-3 | CTACGCCATCAGCTCCAAC |
| MT1-4 | GGTGGATGGATAGTAGTATGGAAGA |
| MT3-1 | GATCTCTCAGTACCTA |
| MT3-2 | GGGTCGCACGAATGTATGCAATG |
| MT3-3 | CTAGGCCATCAGCTGCAAC |
| MT3-4 | GGTGGGGTGGTAGTAGTATGGAAGA |
| Random | ACGGCCTTACGTACGAAC |
| BRAF  V600E | GATTTCTCTGTAGCTA |
| PIK3CA  Q546K | GGGTCTTTCGAATGTATGCAATG |
| KRAS  G12V | CTACGCCAACAGCTCCAAC |
| TP53 | GGTGGATGGGTAGTAGTATGGAAGA |
| S1 | ATGCCAGTCCAGGTCCTGGGTCCGCATCCTCAGCTAGCTACAGAGAAATC |
| S2 | ATCTACGTACGATTACTGACACCTCAGCATTGCATACATTCGAAAGACCC |
| S3 | TGACGTTCGTAATCGTATCCTCAGCGTTGGAGCTGTTGGCGTAG |
| S4 | TCACGATCCTTCAGGATCCCTCAGCTCTTCCATACTATCACCCATCCACC |

**Table S2** Mean results of SERS and qRT-PCR results of real samples (BRAF V600E and PIK3CA Q546K)

| **Day** | **SERS (fM)** | | **qRT-PCR (fM)** | | **RSD (%)** | |
| --- | --- | --- | --- | --- | --- | --- |
| BRAF V600E | PIK3CA Q546K | BRAF V600E | PIK3CA Q546K | BRAF V600E | PIK3CA Q546K |
| 1 | 0.218 | 0.195 | 0.194 | 0.188 | 4.31 | 5.13 |
| 5 | 0.321 | 0.294 | 0.309 | 0.274 | 4.69 | 4.98 |
| 9 | 0.472 | 0.398 | 0.444 | 0.376 | 4.96 | 5.24 |
| 13 | 0.679 | 0.647 | 0.622 | 0.628 | 4.74 | 5.39 |
| 17 | 0.904 | 0.853 | 0.744 | 0.813 | 5.52 | 5.41 |
| 21 | 1.217 | 1.154 | 1.125 | 1.014 | 5.27 | 5.61 |
| 25 | 1.805 | 1.618 | 1.388 | 1.538 | 5.48 | 5.37 |
| 28 | 2.159 | 2.143 | 2.017 | 1.994 | 4.73 | 4.52 |

**Table S3** Mean results of SERS and qRT-PCR results of real samples (KRAS G12V and TP53)

| **Day** | **SERS (fM)** | | **qRT-PCR (fM)** | | **RSD (%)** | |
| --- | --- | --- | --- | --- | --- | --- |
| KRAS G12V | TP53 | KRAS G12V | TP53 | KRAS G12V | TP53 |
| 1 | 0.198 | 0.204 | 0.154 | 0.171 | 4.27 | 4.81 |
| 5 | 0.284 | 0.312 | 0.237 | 0.281 | 5.09 | 4.75 |
| 9 | 0.372 | 0.404 | 0.328 | 0.354 | 5.24 | 5.16 |
| 13 | 0.501 | 0.526 | 0.421 | 0.473 | 5.71 | 5.27 |
| 17 | 0.773 | 0.829 | 0.654 | 0.748 | 4.87 | 4.98 |
| 21 | 0.984 | 1.095 | 0.912 | 0.933 | 4.93 | 5.85 |
| 25 | 1.405 | 1.525 | 1.287 | 1.318 | 5.05 | 4.98 |
| 28 | 1.795 | 1.893 | 1.624 | 1.743 | 4.84 | 5.23 |
